# Supplementary material for: Optimization of Three-Level Cervical Hybrid Surgery to Prevent Adjacent Segment Disease: A Finite Element Study
Source: PubMed Central journal article supplement (PMC7064443; doi:10.3389/fbioe.2020.00154), 2020-03-04
Supplement: Data_Sheet_1.pdf [file Data_Sheet_1.pdf]

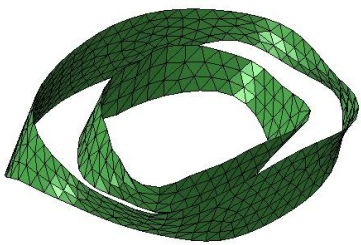

**Annulus fiber layers**

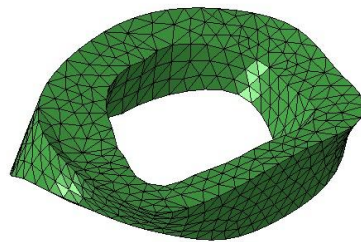

**Annulus ground substance**

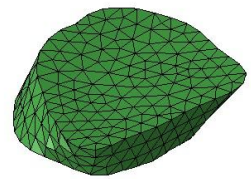

**Nucleus pulposus**

**Figure S1 Finite element model cervical IVD components**

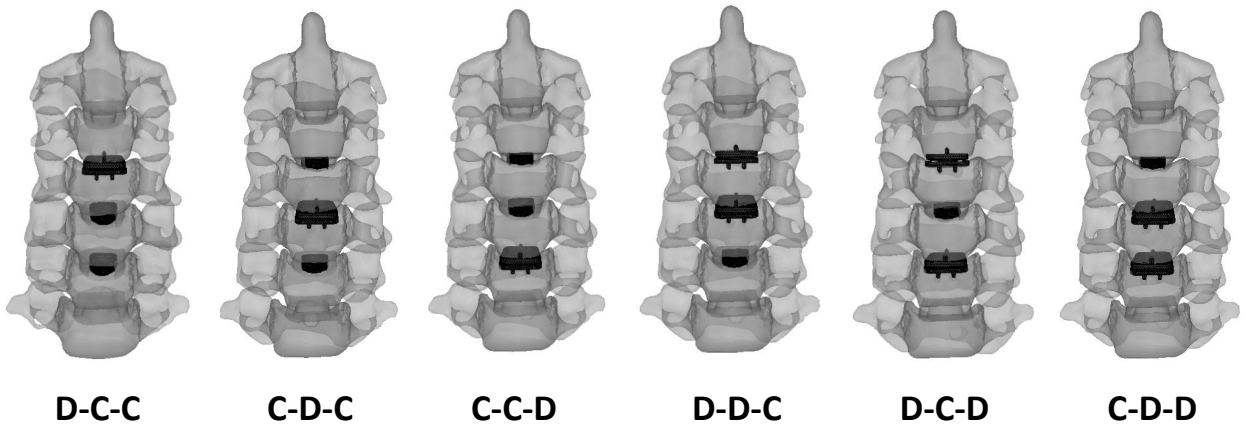

**Figure S2 Schematic illustrations of cervical hybrid surgery**

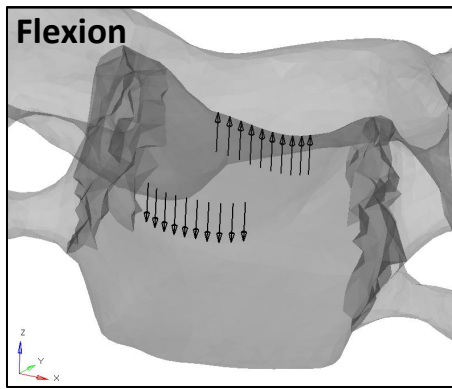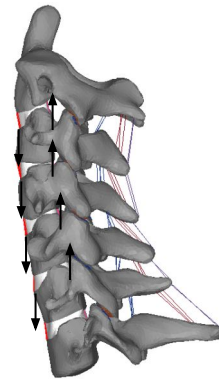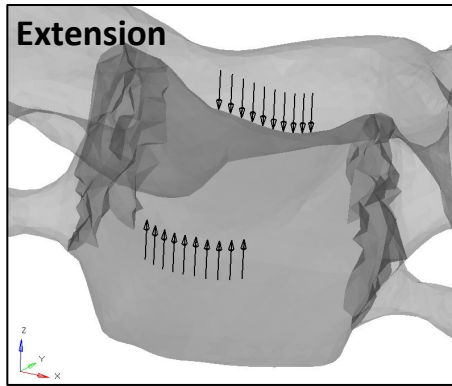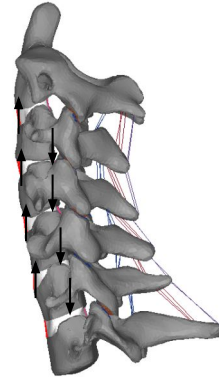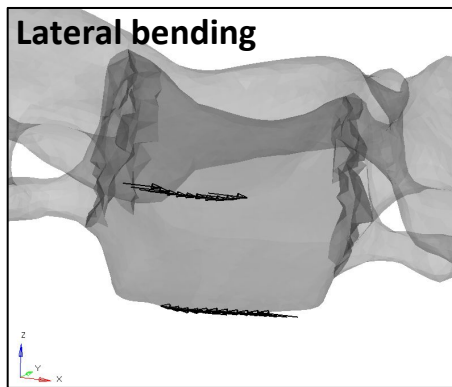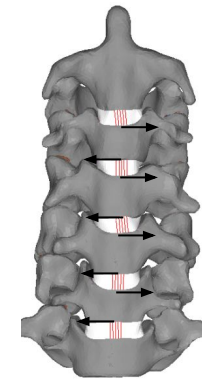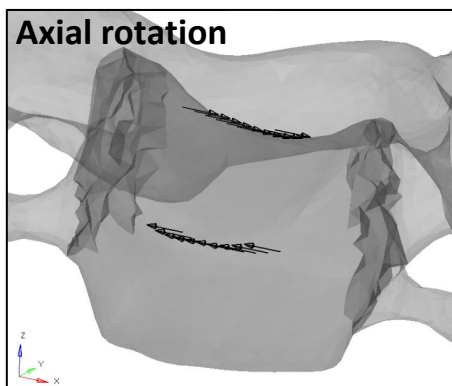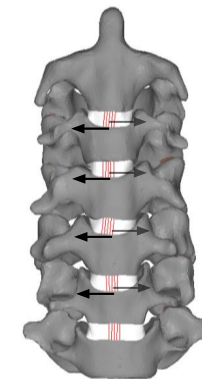

**Figure S3 Moment application in cervical motions**

**Maximal stress at C2-3 and corresponding motion**

|              |          |          |          |          |          |          |          |
|--------------|----------|----------|----------|----------|----------|----------|----------|
| construct    | D-C-C    | C-D-C    | C-C-D    | D-D-C    | D-C-D    | C-D-D    | 3ADR     |
| stress (MPa) | 7.38     | 7.43     | 6.02     | 7.91     | 5.82     | 7.65     | 7.88     |
| motion       | rotation | rotation | rotation | rotation | rotation | rotation | rotation |

**Maximal stress at C6-7 and corresponding motion**

|              |          |          |         |          |         |         |          |
|--------------|----------|----------|---------|----------|---------|---------|----------|
| construct    | D-C-C    | C-D-C    | C-C-D   | D-D-C    | D-C-D   | C-D-D   | 3ADR     |
| stress (MPa) | 9.06     | 6.94     | 4.39    | 6.69     | 4.22    | 4.31    | 4.14     |
| motion       | rotation | rotation | flexion | rotation | flexion | flexion | rotation |

**Table S1 Maximal von Mises stress at adjacent level for each construct**

**Maximal strain energy at C2-3 and corresponding motion**

|               |          |          |          |          |          |          |          |
|---------------|----------|----------|----------|----------|----------|----------|----------|
| construct     | D-C-C    | C-D-C    | C-C-D    | D-D-C    | D-C-D    | C-D-D    | 3ADR     |
| energy (N-mm) | 49.4     | 49.9     | 32.9     | 56.9     | 30.8     | 53.2     | 56.3     |
| motion        | rotation | rotation | rotation | rotation | rotation | rotation | rotation |

**Maximal stain energy at C6-7 and corresponding motion**

|               |          |          |         |          |         |         |          |
|---------------|----------|----------|---------|----------|---------|---------|----------|
| construct     | D-C-C    | C-D-C    | C-C-D   | D-D-C    | D-C-D   | C-D-D   | 3ADR     |
| energy (N-mm) | 74.5     | 43.7     | 17.5    | 40.6     | 16.8    | 17.6    | 15.6     |
| motion        | rotation | rotation | flexion | rotation | bending | flexion | rotation |

**Table S2 Maximal strain energy at adjacent level for each construct**
